# Supplementary material
Source: MDPI journal article supplement (https://www.mdpi.com/1424-2818/16/2/97)
Supplement: s1 [file s1]

## Supplementary material

**Table S1.** List of plants found at sampling site 1, located in the plain close to Wari Maro, Benin.

| Family                      | Genus/Species                                    |
|-----------------------------|--------------------------------------------------|
| Acanthaceae                 | <i>Lepidagathis alopecuroides</i>                |
| Anacardiaceae               | <i>Lannea kerstingii</i>                         |
| Anacardiaceae               | <i>Lannea macroptera</i>                         |
| Annonaceae                  | <i>Annona senegalensis</i>                       |
| Anthericaceae               | <i>Chlorophytum</i> sp.                          |
| Apocynaceae                 | <i>Ceropegia ledermannii</i>                     |
| Apocynaceae                 | <i>Ceropegia racemosa</i> subsp. <i>racemosa</i> |
| Apocynaceae                 | <i>Ectadiopsis oblongifolia</i>                  |
| Apocynaceae                 | <i>Sphaerocodon caffrum</i>                      |
| Araceae                     | <i>Amorphophallus abyssinicus</i>                |
| Araceae                     | <i>Stylochaeton</i> sp.                          |
| Araliaceae                  | <i>Cussonia arborea</i>                          |
| Asparagaceae                | <i>Drimia</i> sp.                                |
| Asteraceae                  | cf. <i>Bidens</i> sp.                            |
| Asteraceae                  | <i>Chromolaena odorata</i>                       |
| Asteraceae                  | <i>Tridax procumbens</i>                         |
| Asteraceae                  | cf. <i>Vernonia</i> sp.                          |
| Combretaceae                | <i>Anogeissus leiocarpa</i>                      |
| Combretaceae                | <i>Combretum collinum</i>                        |
| Combretaceae                | <i>Combretum molle</i>                           |
| Combretaceae                | <i>Pteleopsis suberosa</i>                       |
| Combretaceae                | <i>Terminalia mollis</i>                         |
| Combretaceae                | <i>Terminalia</i> sp.                            |
| Commelinaceae               | <i>Commelina erecta</i>                          |
| Commelinaceae               | <i>Cyanotis longifolia</i>                       |
| Cyperaceae                  | <i>Cyperus</i> cf. <i>cyperoides</i>             |
| Cyperaceae                  | indet.                                           |
| Dioscoreaceae               | <i>Dioscorea</i> sp. 1                           |
| Dioscoreaceae               | <i>Dioscorea</i> sp. 2                           |
| Dioscoreaceae               | <i>Dioscorea</i> sp. 3                           |
| Dioscoreaceae               | <i>Dioscorea</i> sp. 4                           |
| Dioscoreaceae               | <i>Dioscorea</i> sp. 5                           |
| Dioscoreaceae               | <i>Dioscorea abyssinica</i>                      |
| Euphorbiaceae               | <i>Bridelia</i> sp.                              |
| Euphorbiaceae               | <i>Euphorbia hirta</i>                           |
| Fabaceae                    | indet. 1                                         |
| Fabaceae                    | indet. 2                                         |
| Fabaceae (Caesalpinioideae) | cf. <i>Burkea africana</i>                       |
| Fabaceae (Caesalpinioideae) | <i>Chamaecrista</i> sp.                          |
| Fabaceae (Caesalpinioideae) | <i>Entada africana</i>                           |
| Fabaceae (Caesalpinioideae) | <i>Senna</i> sp.                                 |
| Fabaceae (Cercidoideae)     | <i>Piliostigma</i> sp.                           |
| Fabaceae (Cercidoideae)     | <i>Piliostigma thoningii</i>                     |
| Fabaceae (Detarioideae)     | <i>Daniellia oliveri</i>                         |

|                           |                                                    |
|---------------------------|----------------------------------------------------|
| Fabaceae (Detarioideae)   | <i>Detarium microcarpum</i>                        |
| Fabaceae (Detarioideae)   | <i>Isoberlinia doka</i>                            |
| Fabaceae (Faboideae)      | indet. 3                                           |
| Fabaceae (Papilionoideae) | <i>Indigofera</i> sp.                              |
| Fabaceae (Papilionoideae) | <i>Lonchocarpus sericeus</i>                       |
| Fabaceae (Papilionoideae) | <i>Nesphostylis holosericea</i>                    |
| Fabaceae (Papilionoideae) | <i>Pterocarpus erinaceus</i>                       |
| Lamiaceae                 | <i>Hyptis</i> sp.                                  |
| Lamiaceae                 | <i>Rothea</i> sp.                                  |
| Lamiaceae                 | cf. <i>Platystoma africanum</i>                    |
| Lamiaceae/Verbenaceae     | indet.                                             |
| Loganiaceae               | <i>Strychnos spinosa</i>                           |
| Malvaceae                 | <i>Abutilon ramosum</i>                            |
| Malvaceae                 | <i>Bombax costatum</i>                             |
| Malvaceae                 | <i>Grewia</i> sp.                                  |
| Malvaceae                 | indet.                                             |
| Malvaceae                 | <i>Sida rhombifolia</i>                            |
| Malvaceae                 | <i>Waltheria</i> sp.                               |
| Moraceae                  | <i>Dorstenia cuspidata</i>                         |
| Moraceae                  | <i>Ficus</i> cf. <i>glumosa</i>                    |
| Opiliaceae                | <i>Opilia celtidifolia</i>                         |
| Orchidaceae               | indet.                                             |
| Orchidaceae               | <i>Calypstrochilum</i> sp.                         |
| Orchidaceae               | <i>Nervilia kotschy</i>                            |
| Oxalidaceae               | <i>Biophytum petersianum</i>                       |
| Phyllanthaceae            | <i>Flueggea virosa</i>                             |
| Phyllanthaceae            | <i>Phyllanthus</i> sp.                             |
| Poaceae                   | <i>Andropogon</i> sp.                              |
| Poaceae                   | cf. <i>Paspalum</i> sp.                            |
| Poaceae                   | cf. <i>Setaria</i> sp.                             |
| Poaceae                   | <i>Oplismenus</i> sp.                              |
| Poaceae                   | cf. <i>Panicum pilosum</i>                         |
| Rubiaceae                 | <i>Sericanthe chevalieri</i>                       |
| Rubiaceae                 | cf. <i>Spermacoce</i> sp.                          |
| Rubiaceae                 | <i>Pavetta crassipes</i>                           |
| Sapotaceae                | <i>Vitellaria paradoxa</i>                         |
| Taccaceae                 | <i>Tacca leonpetaloides</i>                        |
| Verbenaceae               | <i>Lantana rhodesiensis</i>                        |
| Verbenaceae               | <i>Gmelina arborea</i>                             |
| Vitaceae                  | <i>Cayratia</i> sp.                                |
| Vitaceae                  | <i>Cayratia ibuensis</i>                           |
| Vitaceae                  | <i>Cissus</i> sp.                                  |
| Vitaceae                  | <i>Cissus populnea</i>                             |
| Vitaceae                  | <i>Cyphostemma sokodensis</i>                      |
| Zamiaceae                 | <i>Encephalartos barteri</i> subsp. <i>barteri</i> |
| Zingiberaceae             | <i>Siphonochilus aethiopicus</i>                   |

**Table S2.** List of plants found at sampling site 2, located on top of the inselberg Soubakpérou close to Wari Maro, Benin.

| <b>Family</b>  | <b>Genus/Species</b>                   |
|----------------|----------------------------------------|
| Amaryllidaceae | <i>Scadoxus multiflorus</i>            |
| Araceae        | <i>Amorphophallus dracontoides</i>     |
| Araceae        | <i>Anchomanes</i> cf. <i>difformis</i> |
| Araceae        | <i>Stylochaeton</i> sp.                |
| Capparaceae    | <i>Cleome rutidosperma</i>             |
| Capparaceae    | <i>Crateva adansonii</i>               |
| Commelinaceae  | <i>Commelina erecta</i>                |
| Cyperaceae     | <i>Cyperus</i> cf. <i>soyauxii</i>     |
| Ebenaceae      | <i>Diospyros</i> sp.                   |
| Lamiaceae      | <i>Solenostemon</i> sp.                |
| Malvaceae      | cf. <i>Abutilon ramosum</i>            |
| Malvaceae      | <i>Adansonia digitata</i>              |
| Malvaceae      | <i>Bombax costatum</i>                 |
| Moraceae       | <i>Ficus abutilifolia</i>              |
| Orchidaceae    | <i>Nervilia bicarinata</i>             |
| Poaceae        | <i>Oplismenus</i> sp.                  |
| Poaceae        | indet. 1                               |
| Poaceae        | indet. 2                               |
| Sapotaceae     | <i>Manilkara multinervis</i>           |
| cf. Urticaceae | indet.                                 |
| Urticaceae     | <i>Pouzolzia guineensis</i>            |
| Vitaceae       | <i>Cissus populnea</i>                 |

**Table S3.** Soil characteristics of the two Geric Ferralsols in Benin, investigated in this study. Samples denoted by site / horizon and layer. Amounts of iron, manganese and aluminium: oxalate soluble, dithionite soluble and the activity (ratio between oxalate and dithionite soluble).

| sample |       | iron |       |          | manganese |       |          | aluminium |       |          |
|--------|-------|------|-------|----------|-----------|-------|----------|-----------|-------|----------|
|        |       | ox   | dith. | activity | ox        | dith. | activity | ox        | dith. | activity |
|        |       | [%]  | [%]   | [%]      | [%]       | [%]   | [%]      | [%]       | [%]   | [%]      |
| site 1 | 1/I1  | 0.03 | 0.36  | 8        | 0.03      | 0.03  | 98       | 0.03      | 0.08  | 33       |
|        | 1/I2  | 0.02 | 0.30  | 7        | 0.02      | 0.02  | 98       | 0.02      | 0.08  | 21       |
| site 2 | 2/I1  | 0.10 | 0.80  | 11       | 0.08      | 0.08  | 100      | 0.06      | 0.17  | 36       |
|        | 2/II1 | 0.10 | 1.29  | 8        | 0.06      | 0.06  | 89       | 0.07      | 0.05  | 28       |
|        | 2/II2 | 0.10 | 1.20  | 9        | 0.06      | 0.07  | 98       | 0.07      | 0.23  | 30       |

**Table S4.** Yields and quality of fungal read pairs obtained by environmental sequencing of the ITS2 region from two Geric Ferralsols from Benin. Number of read pairs, total number of bases, proportion of bases that reach a quality of at least 30 (i. e. 99,9 % probability for a correct base call), average base quality for all samples and number of MOTUs found in each replicate gained from the two sites, their defined depth and horizon. The negative control was provided by the company that conducted the sequencing.

| Replicate name          |         | Number of read pairs | Yield (Kbp) | % bases Q ≤ Q30 | Mean Q | Number of MOTUs |
|-------------------------|---------|----------------------|-------------|-----------------|--------|-----------------|
| site 1                  | 1/I1/a  | 131,672              | 73,736      | 77              | 31     | 1,307           |
|                         | 1/I1/b  | 193,802              | 108,529     | 77              | 31     | 1,415           |
|                         | 1/I1/c  | 131,775              | 73,794      | 76              | 31     | 1,257           |
|                         | 1/I2/a  | 180,019              | 100,810     | 75              | 31     | 1,011           |
|                         | 1/I2/b  | 76,125               | 42,630      | 76              | 31     | 1,127           |
|                         | 1/I2/c  | 157,246              | 88,057      | 74              | 30     | 1,349           |
| site 2                  | 2/I1/a  | 110,176              | 61,698      | 75              | 31     | 1,235           |
|                         | 2/I1/b  | 141,824              | 79,421      | 74              | 31     | 1,327           |
|                         | 2/I1/c  | 137,124              | 76,789      | 75              | 31     | 1,231           |
|                         | 2/I1/d  | 152,465              | 85,380      | 75              | 31     | 1,327           |
|                         | 2/II1/a | 102,721              | 57,523      | 74              | 30     | 858             |
|                         | 2/II1/b | 105,784              | 59,239      | 74              | 30     | 415             |
|                         | 2/II1/c | 172,021              | 96,331      | 73              | 30     | 850             |
|                         | 2/II2/a | 194,870              | 109,127     | 74              | 30     | 796             |
|                         | 2/II2/b | 111,407              | 62,387      | 74              | 30     | 752             |
|                         | 2/II2/c | 147,696              | 82,709      | 74              | 30     | 812             |
| <b>Total</b>            |         | 2,250,129            | 1,260,065   | 75              | 31     | 4,299           |
| <b>Negative control</b> |         | 3,402                | 1,905       | 76              | 31     | not determined  |
